# Supplementary material
Source: PubMed Central journal article supplement (PMC4790870)
Supplement: supp_tpc.15.00637_TPC2015-00637-RAR2_Supplemental_Data.pdf [file supp_tpc.15.00637_TPC2015-00637-RAR2_Supplemental_Data.pdf]

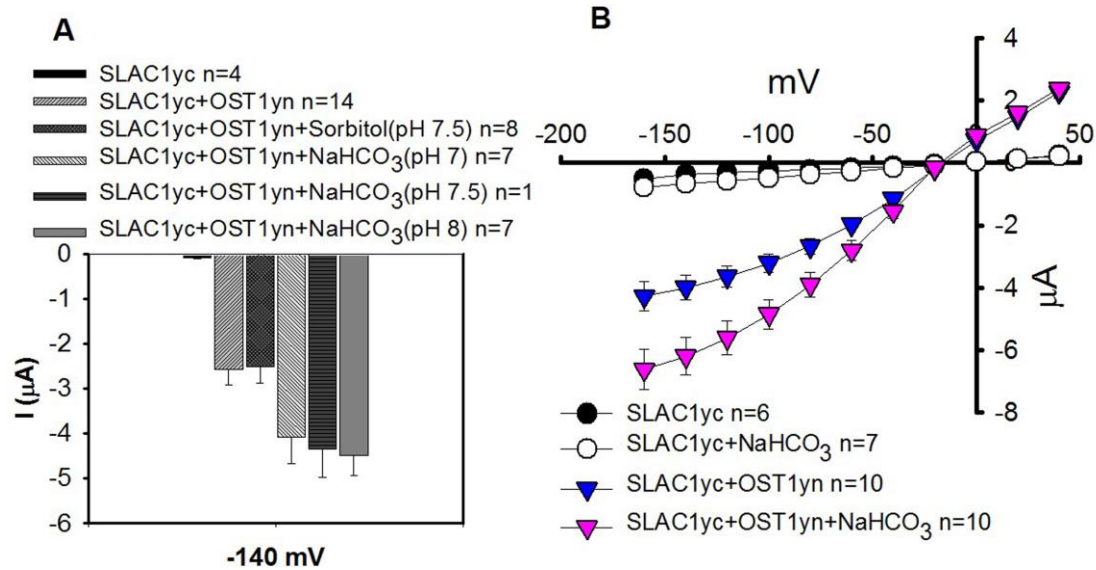

**Supplemental Figure 1. (A, B)** Injection of 11.5 mM NaHCO<sub>3</sub> (**A**) at pH 7 or pH 8 into oocytes and (**B**) recordings in 96 mM NaCl extracellular buffer also cause enhancement of SLAC1-mediated anion channel currents, whereas (**A**) 23 mM sorbitol injection has no effect on SLAC1 activity. (**B**) Note that the reversal potential of SLAC1yc + OST1yn-mediated currents in (B) was close to the Cl<sup>-</sup> equilibrium potential. Data are mean ± s.e.m.

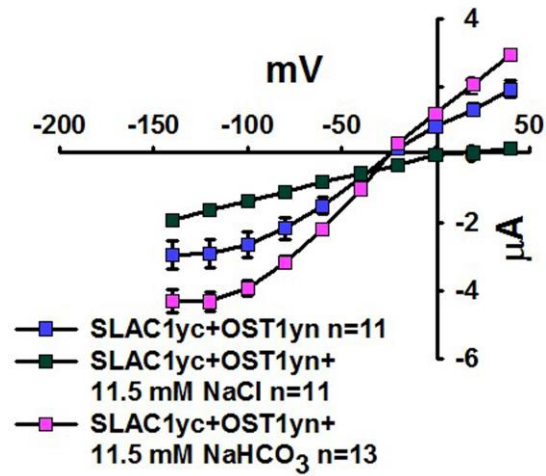

**Supplemental Figure 2.** Steady-state current-voltage relationships show the average magnitude of SLAC1yc/OST1yn-mediated anion channel currents recorded from oocytes injected with 11.5 mM NaCl were reduced rather than enhanced. Data are mean  $\pm$  s.e.m. Data are representative of experiments performed on three independent oocyte batches.

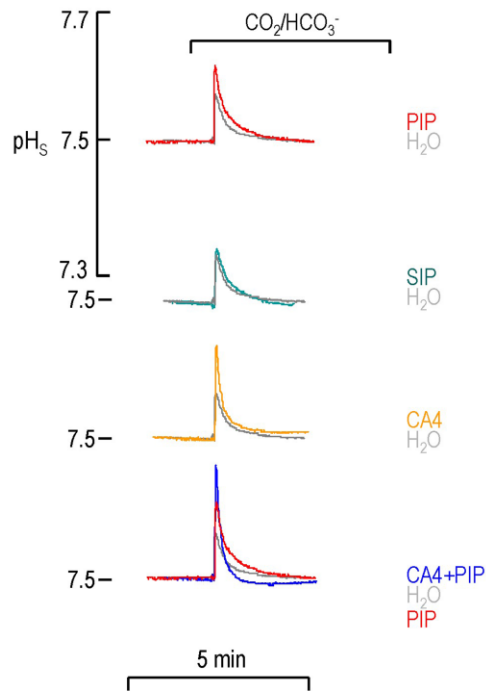

**Supplemental Figure 3.** Surface pH ( $\text{pH}_s$ ) measurements from oocytes exposed to  $\text{CO}_2/\text{HCO}_3^-$ . Oocytes were exposed to 5%  $\text{CO}_2/33$  mM  $\text{HCO}_3^-$  long enough for the  $\text{pH}_s$  to rise and then decay exponentially to a stable value. Traces from oocytes recorded in the same batch are shown.

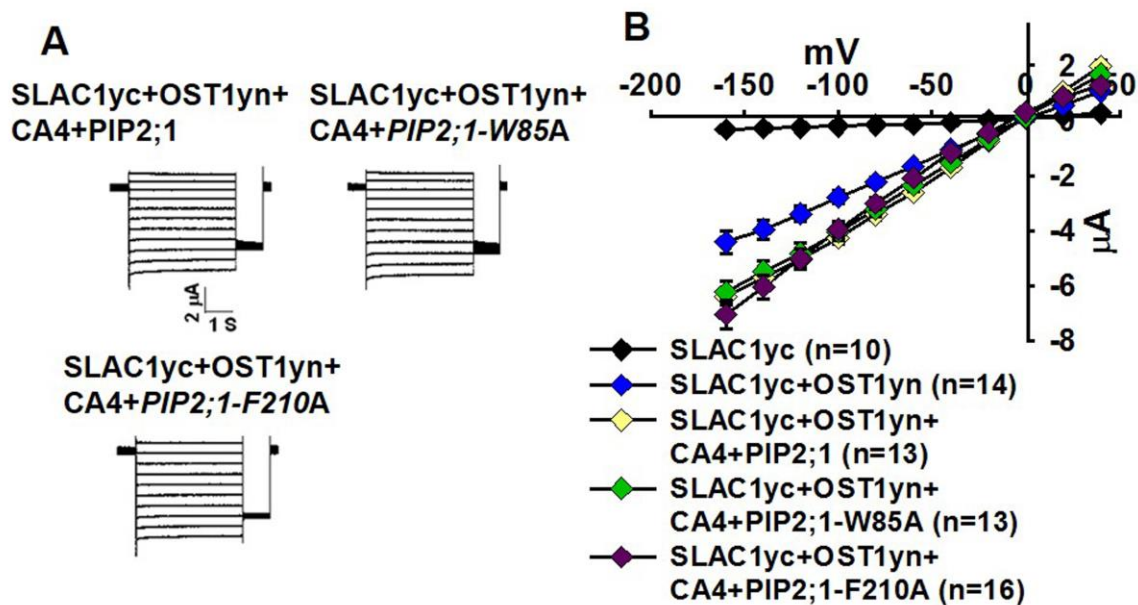

**Supplemental Figure 4.** The *PIP2;1-W85A* and *PIP2;1-F210A* mutation isoforms do not impair the PIP2;1-CA4 enhancement of SLAC1/OST1-mediated anion channel currents in oocytes by extracellular  $\text{CO}_2/\text{HCO}_3^-$ . **(A)** Whole-cell currents were recorded from oocytes expressing the indicated cRNAs with 11.5 mM  $\text{NaHCO}_3$  in the bath solution. The voltage protocol was the same as in Figure 1. **(B)** Steady-state current-voltage relationships from oocytes recorded as in (A). Data are mean  $\pm$  s.e.m. Results from three independent batches of oocytes showed similar results.

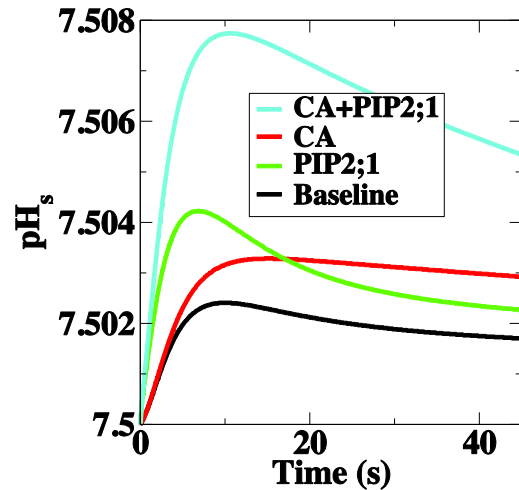

**Supplemental Figure 5.** Simulated membrane surface pH (pH<sub>s</sub>) as a function of time for baseline parameter values (black curve), in the presence of intracellular carbonic anhydrase (CA) activity (red curve), for simulated increased membrane CO<sub>2</sub> permeability (green curve), and in the presence of both intracellular CA activity and increased membrane CO<sub>2</sub> permeability (blue curve). An extracellular CO<sub>2</sub> increase from 200 ppm to 800 ppm (Hanstein et al., 2001) was simulated (see Methods), resulting in smaller modeled membrane surface pH (pH<sub>s</sub>) changes than when larger CO<sub>2</sub> concentration steps were applied experimentally in oocytes.

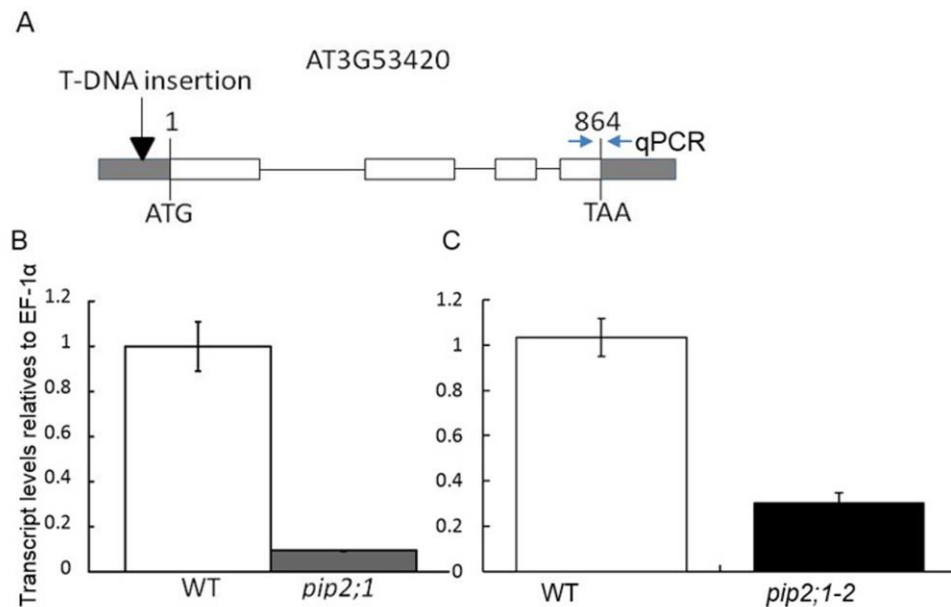

**Supplemental Figure 6. (A)** Structure of *PIP2;1* gene and T-DNA insertion. *PIP2;1* consists of four exons (open boxes); black boxes highlight the 5' and 3' untranslated regions, respectively. Mutant line *pip2;1* (ABRC stock name CS320492) has a T-DNA insertion in 5'-UTR region. The location of qPCR primers is shown by opposing arrows. **(B)** qPCR analyses suggested that *pip2;1* is a knockdown mutant. Expression level was compared to *EF-1a*. **(C)** qPCR analyses suggest that *pip2;1-2* (Grondin et al., 2015) is a knockdown mutant. Expression level was compared to *EF-1a*. Data were presented by means  $\pm$  s.e.m, n=3.

| Name         | sequence (5'-3')                                  |
|--------------|---------------------------------------------------|
| CA4NBF       | GGCTTAAUAATGGCTCCTGCATTCCGG                       |
| CA4NBR       | GGTTTAAUTTCCGGTAGCTTTCTTTC                        |
| CA4GBKF      | CAGAATTCGACGAAATGGCAACGGAATC                      |
| CA4GBKR      | CAGGATCCTTCCGGTAGCTTTCTTTC                        |
| PIP2;1-pNB1F | GGCTTAAUTAACTATGGCAAAGGATG                        |
| PIP2;1-pNB1R | GGTTTAAUGACTGATTTAGATTTGTACAGAGAG                 |
| SIP1A-pNB1F  | GGCTTAAUTACCACCCACCTAACCAC                        |
| SIP1A-pNB1R  | GGTTTAAUCTTTCTACAGCCCAAACC                        |
| CA4F         | GGGGACAAGTTTGTACAAAAAAGCAGGCTAATGGCTCCTGCATTCCGG  |
| CA4R         | GGGGACCACTTTGTACAAGAAAGCTGGGTAGGCAAAGCAGGAGTG     |
| PIP2;1F      | GGGGACAAGTTTGTACAAAAAAGCAGGCTTCTCACTAACCACTCCAACA |
| PIP2;1R      | GGGGACCACTTTGTACAAGAAAGCTGGGTCACTTCTGAATGATCCAAGA |
| RHC1-pNB1F   | GGCTTAAUATGTCAGAAACATCAAAGTC                      |
| RHC1-pNB1R   | GGTTTAAUCTATGAGTGGCTATCTTGTC                      |
| qEF-1aF      | TGAGCACGCTCTTCTTGCTTTCA                           |
| qEF-1aR      | GGTGGTGGCATCCATCTTGTTACA                          |

**Supplemental Table 1.** Primers Used for Construct and Expression Studies.
